# Supplementary material for: Comparative assessment of Graves’ disease and main extrathyroidal manifestation, Graves’ ophthalmopathy, by non-targeted metabolite profiling of blood and orbital tissue
Source: PubMed Central journal article supplement (PMC6006143; doi:10.1038/s41598-018-27600-0), 2018-06-18
Supplement: 41598_2018_27600_MOESM2_ESM.pdf [file 41598_2018_27600_MOESM2_ESM.pdf]

**Comparative assessment of Graves' disease and main extrathyroidal manifestation, Graves' ophthalmopathy, by non-targeted metabolite profiling of blood and orbital tissue**

Dong Yoon Ji<sup>1¶</sup>, Se Hee Park, MD<sup>2,3¶</sup>, Soo Jin Park<sup>1</sup>, Kyoung Heon Kim<sup>4</sup>, Cheol Ryong Ku, MD, PhD<sup>2,5</sup>, Dong Yeob Shin, MD, PhD<sup>2,5</sup>, Jin Sook Yoon, MD, PhD<sup>6</sup>, Do Yup Lee<sup>1\*</sup>, and Eun Jig Lee, MD, PhD<sup>2,5\*</sup>

<sup>1</sup>The Department of Bio and Fermentation Convergence Technology, BK21 PLUS Program, Kookmin University, Seoul, Republic of Korea

<sup>2</sup>Division of Endocrinology and Metabolism, Department of Internal Medicine, Yonsei University College of Medicine, Seoul, Republic of Korea

<sup>3</sup>Graduate School, Yonsei University College of Medicine, Seoul, Republic of Korea

<sup>4</sup>The Department of Biotechnology, Graduate School, Korea University, Seoul, Republic of Korea

<sup>5</sup>Institute of Endocrine Research, Yonsei University College of Medicine, Seoul, Republic of Korea

<sup>6</sup>Department of Ophthalmology, Yonsei University College of Medicine, Seoul, Republic of Korea

¶These authors contributed equally to this work.

\*Corresponding Authors:

Eun Jig Lee ([ejlee423@yuhs.ac](mailto:ejlee423@yuhs.ac))

Division of Endocrinology and Metabolism, Department of Internal Medicine, Yonsei University College of Medicine, Seoul 03722, Republic of Korea

Phone: +82 2 2228 0833, Fax: +82 2 393 6884

Do Yup Lee ([rome73@kookmin.ac.kr](mailto:rome73@kookmin.ac.kr))

The Department of Bio and Fermentation Convergence Technology, BK21 PLUS program, Kookmin

University, Seoul 02707, Republic of Korea

Phone: +82 2 910 5733, Fax: +82 2 910 5733

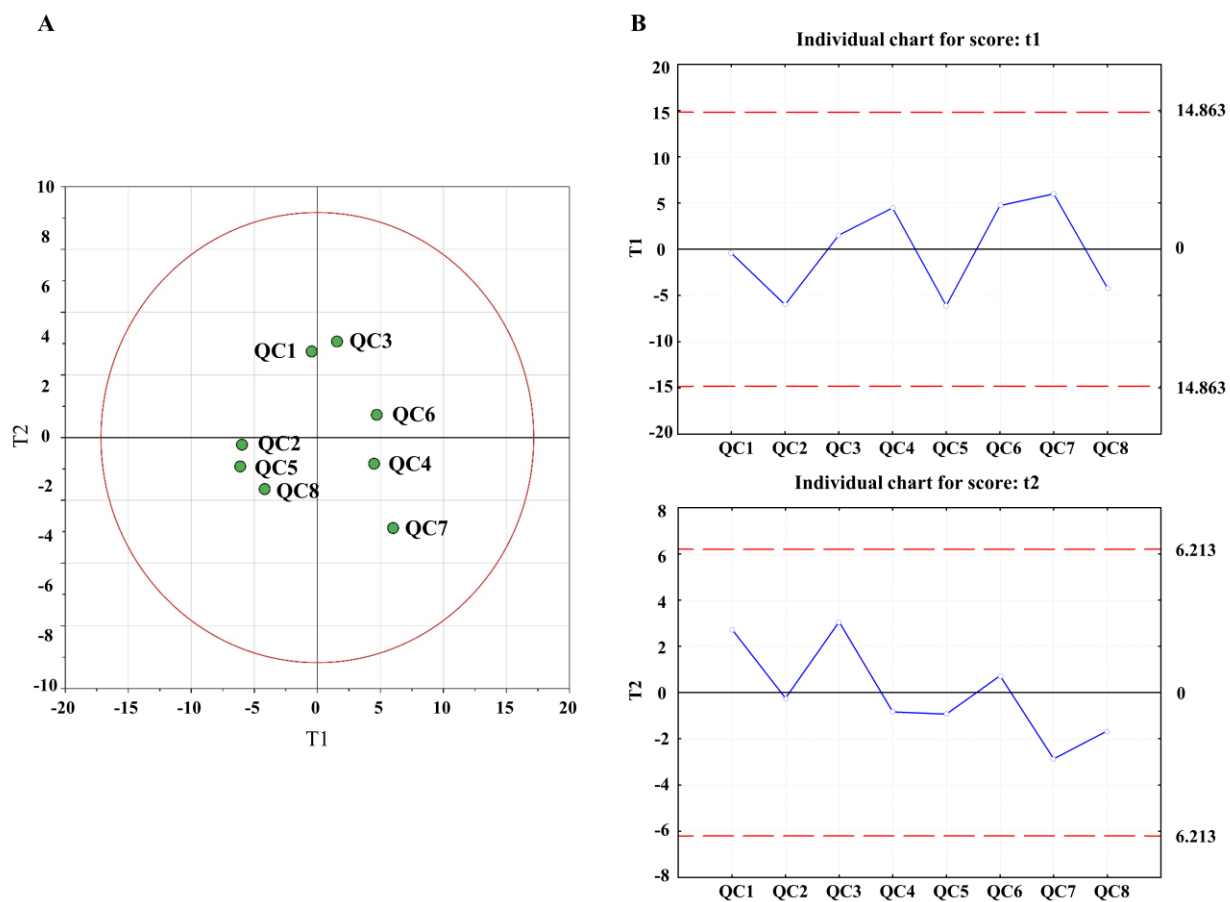

**Supplementary Figure S1. Principal component analysis of QC mixture compounds.** (A) Score scatter plot of metabolite profiles of 8 QC samples with T1 and T2. X (T1)- and Y(T2)-axis indicate the most and the second most discriminant vectors, respectively. 0.05 as significance level. (B) Line plots (score control chart) with T1 (upper panel) and T2 (lower panel).

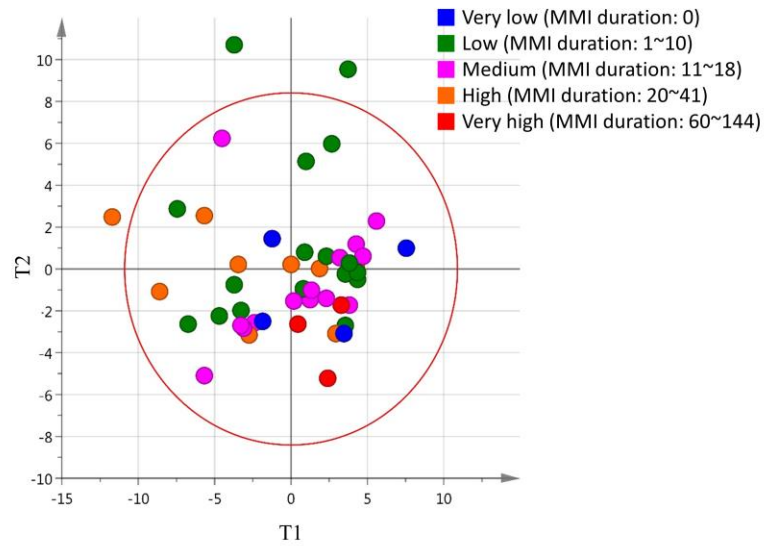

**Supplementary Figure S2. Principal component analysis for the potential effects of Methimazole on blood plasma metabolite profiles.** Score scatter plot of 47 samples with T1 and T2. X (T1)- and Y(T2)-axis indicate the most and the second most discriminant vectors, respectively. Red circle is the two-dimensional boundary of 47 standard deviation. Color indicates different MMI duration sorted by five periods.

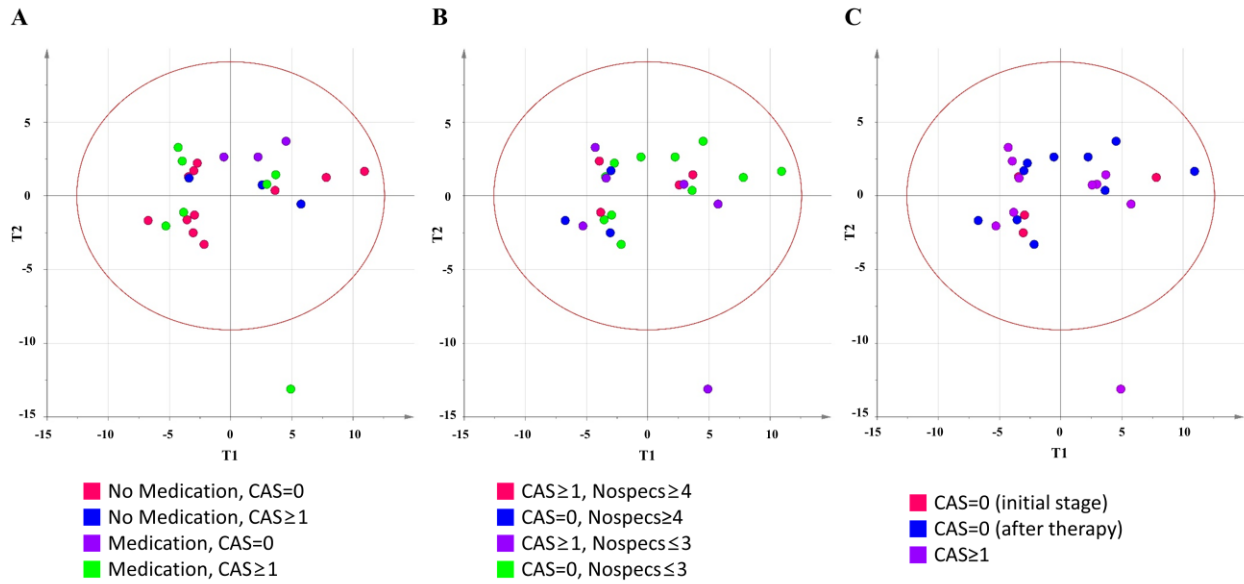

**Supplementary Figure S3. Score scatter plots by PCA for four groups categorized by the combination of CAS and steroid medication (A), NOSPECS and CAS (B), and for three groups, CAS=0 (initial stage), CAS=0 (after therapy), and the others (CAS $\geq$ 1) (C) in the GO group.**

A. 1st set

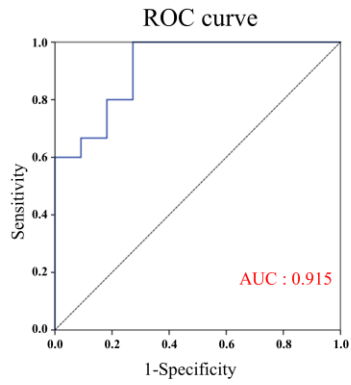

B. 2nd set

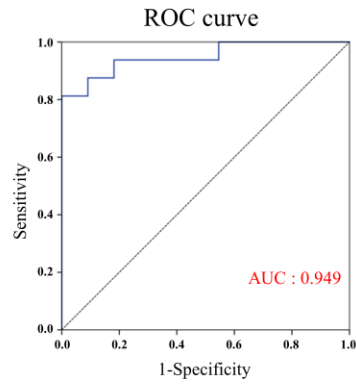

C. 3rd set

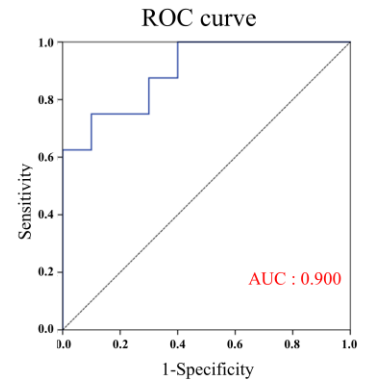

**Supplementary Figure S4. Receiver operating characteristic (ROC) analysis of 3 independent test set that thirty percent (26 subjects) of all subjects (79 subjects) are randomly selected and used.**

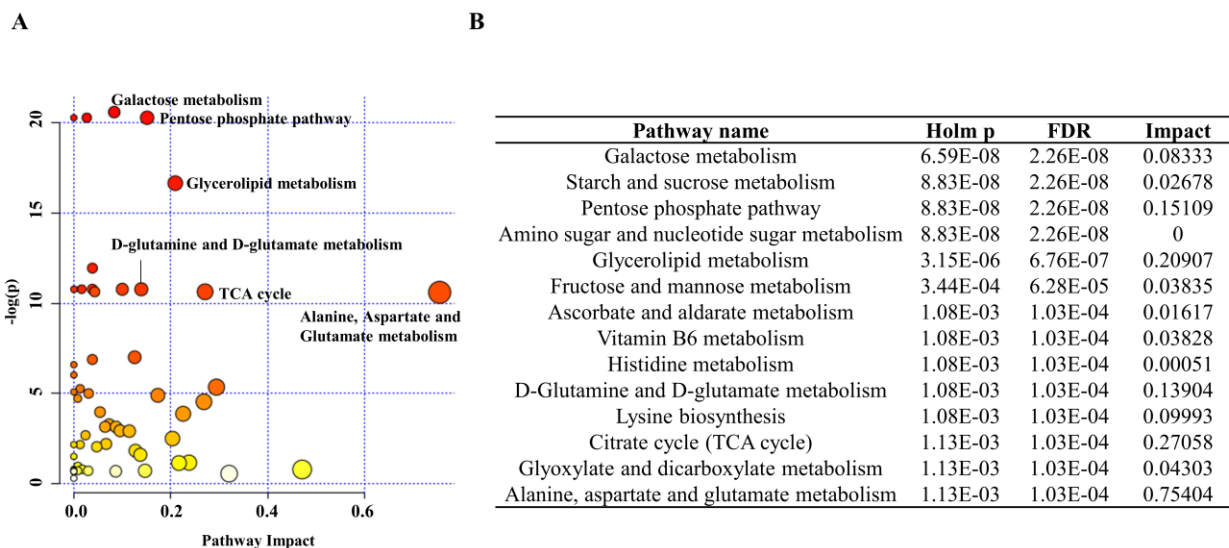

**Supplementary Figure S5. Pathway enrichment analysis of plasma metabolite profiles of the Graves' disease group compared to the healthy control.** The analysis is conducted on all continuous variables (metabolites) with the relative concentrations without pre-determined statistical cutoff. (A) Pathway impact values, estimated from the number of connection of a node (a metabolite), are plotted against X-axis. The values are computed by number of shortest routes passing through the node (betweenness centrality). The higher score suggests that the metabolite is located in topologically and putatively biochemically important position. P-values are plotted against Y-axis, which presents the significant levels of pathway alteration cumulatively computed by the significance of metabolite changes in a pathway. For visual clarification, the pathway importance and the statistical significance are proportional to node radius and color respectively. (B) The list of metabolic pathways with significant difference the GD group compared to healthy controls. The statistical significance is

evaluated and presented by adjusted p values (Holm-Bonferroni p values) and false discovery rate (FDR).



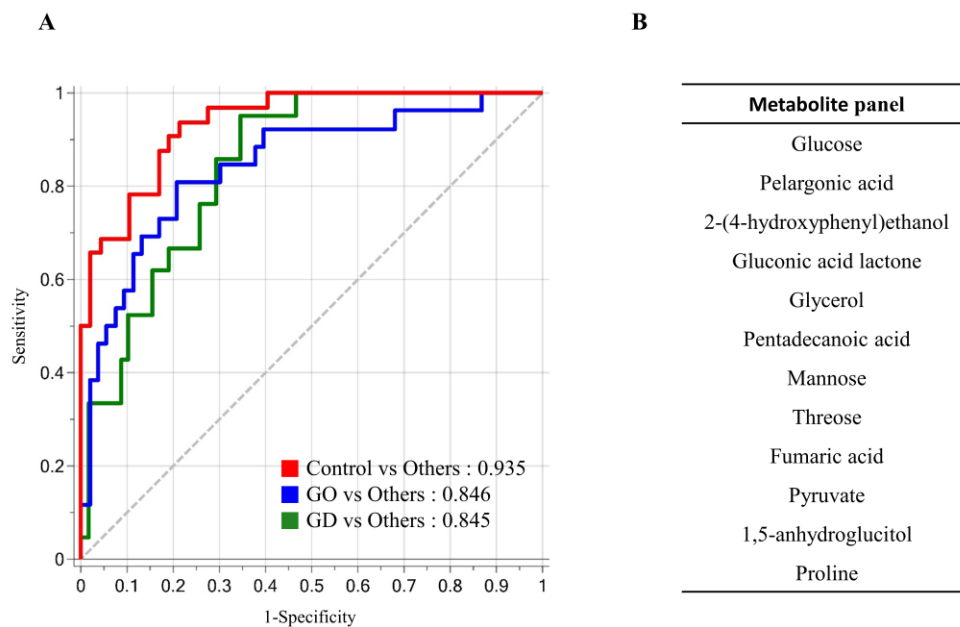

**Supplementary Figure S6. (A) Receiver operating characteristic (ROC) analysis of multiple metabolite panels for discriminating the three different groups (GO, GD, and healthy control). (B) The list of metabolite panel is provided in the right panel.**

**Supplementary Table S1. Clinical characteristics of the patients with Graves' ophthalmopathy included in the tissue analysis**

| <b>Case</b> | <b>Age/Sex</b> | <b>Duration of GO, m</b> | <b>Smoking</b> | <b>Previous treatment</b> | <b>CAS</b> | <b>Proptosis Rt/Lt, mm</b> | <b>Surgical treatment</b> |
|-------------|----------------|--------------------------|----------------|---------------------------|------------|----------------------------|---------------------------|
| 1           | 36/F           | 36                       | Yes            | GC                        | 1/7        | 21/20                      | Decompression             |
| 2           | 51/M           | 12                       | Yes            | GC                        | 3/7        | 21/23.5                    | Decompression             |
| 3           | 59/M           | 192                      | Yes            | GC                        | 2/7        | 22/21                      | Decompression             |
| 4           | 61/M           | 4                        | Yes            | GC                        | 3/7        | 21/21                      | Decompression             |
| 5           | 61/F           | 24                       | No             | GC                        | 3/7        | 20.5/21                    | Decompression             |

The range of CAS was from 0 to 7. GO, Graves' ophthalmopathy; CAS, clinical activity score, GC, glucocorticoid
